# Supplementary material for: High-Confidence Placement of Fragments into Electron Density Using Anomalous Diffraction—A Case Study Using Hits Targeting SARS-CoV-2 Non-Structural Protein 1
Source: MDPI journal article supplement (doi:10.3390/ijms241311197), 2023-07-07
Supplement: s1 [file s1]

## Supplementary Material Section

# High-Confidence Placement of Fragments into Electron Density Using Anomalous Diffraction—A Case Study Using Hits Targeting SARS-CoV-2 Non-Structural Protein 1

Shumeng Ma <sup>1</sup>, Vitaliy Mykhaylyk <sup>2</sup>, Matthew W. Bowler <sup>3</sup>, Nikos Pinotsis <sup>4</sup> and Frank Kozielski <sup>1,\*</sup>

<sup>1</sup> School of Pharmacy, University College London, 29–39 Brunswick Square, London WC1N 1AX, UK; shumeng.ma.20@ucl.ac.uk

<sup>2</sup> Diamond Light Source, Harwell Science and Innovation Campus, Chilton, Didcot OX11 0DE, UK; vitaliy.mykhaylyk@diamond.ac.uk

<sup>3</sup> European Molecular Biology Laboratory, 38000 Grenoble, France; mbowler@embl.fr

<sup>4</sup> Institute of Structural and Molecular Biology, Birkbeck College, London WC1E 7HX, UK; n.pinotsis@mail.cryst.bbk.ac.uk

\* Correspondence: f.kozielski@ucl.ac.uk

## Content

|           |   |
|-----------|---|
| Figure S1 | 1 |
| Figure S2 | 2 |

**Figure S1**

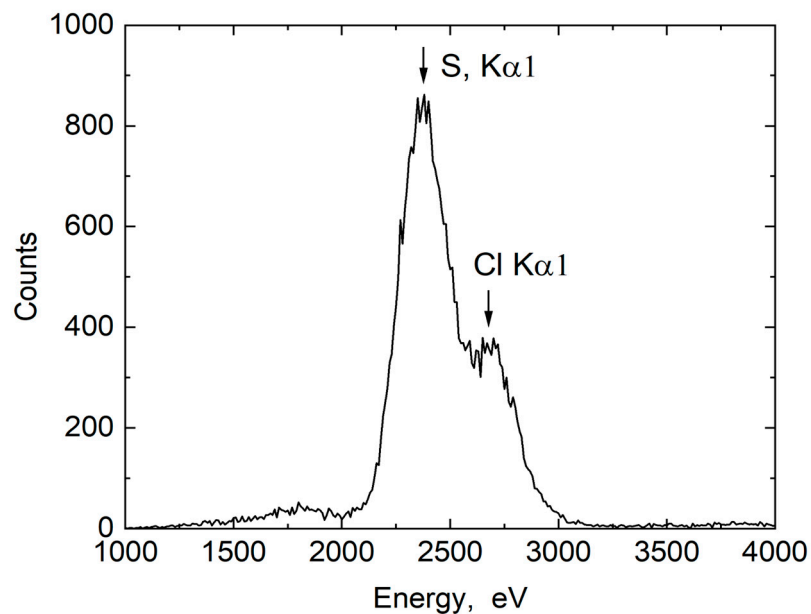

**Figure S1.** X-ray fluorescence spectra of the nsp1-11C6 crystal sample. The peaks at 2308 and 2622 keV correspond to  $K_{\alpha 1}$  emission lines of sulphur and chlorine. The elevation at low energy is a background predominantly caused by X-ray emission of silicon from the detector.

**Figure S2**

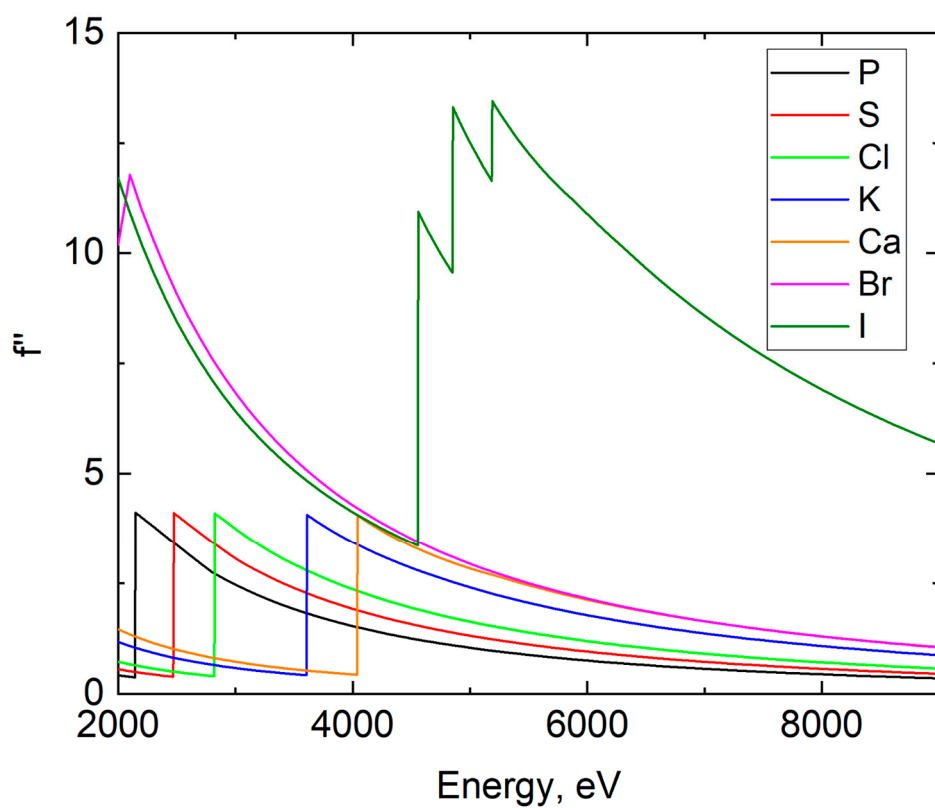

**Figure S2.** Energy dependence of the anomalous contribution to the structural factor  $f''$  for biologically relevant light ions and halides (data from [www.bmsc.washington.edu](http://www.bmsc.washington.edu)). The value of  $f''$  manifests a sharp increase at the K-edge of light atoms (P, S, Cl, K, Ca) or L-edges of Br and I thus enabling positive identification of the ions.
